# Supplementary material
Source: PubMed Central journal article supplement (PMC7016075)

**Supplementary tables and figure, Sequential extraction of protein and inulin from the tubers of  
*Jerusalem artichoke (Helianthus tuberosus)*, Journal of Food Science and Technology.**

**Table S1** Factorial design to determine significant factors for protein and inulin extraction

**Table S2** Chemical composition of JA tubers

| Run | pH | Solid loading w/v | Temperature<br>°C | Inulin  | Protein |
|-----|----|-------------------|-------------------|---------|---------|
|     |    |                   |                   | Yield % | Yield % |
| 1   | 3  | 2.5               | 25                | 16.73   | 6.61    |
| 2   | 7  | 2.5               | 25                | 15.25   | 4.83    |
| 3   | 3  | 4.5               | 25                | 19.12   | 8.67    |
| 4   | 7  | 4.5               | 25                | 17.03   | 5.64    |
| 5   | 3  | 2.5               | 60                | 24.97   | 6.38    |
| 6   | 7  | 2.5               | 60                | 32.94   | 5.85    |
| 7   | 3  | 4.5               | 60                | 13.41   | 6.41    |
| 8   | 7  | 4.5               | 60                | 23.76   | 4.94    |
| 9   | 5  | 3.5               | 42.5              | 22.74   | 7.71    |
| 10  | 5  | 3.5               | 42.5              | 24.47   | 7.32    |

---

\* The yields (%) are expressed on dry matter basis

| Component   |             | % DM*      |
|-------------|-------------|------------|
| Extractives | Free Sugars | 2.77±0.1   |
|             | Inulin      | 71.33±4.34 |
|             | Protein     | 7.50±0.04  |
| Fibres      | Xylose      | 3.48±0.24  |
|             | Arabinose   | 3.00±0.32  |
|             | Glucose     | 6.23±0.73  |

\*Numbers are mean values ± standard deviations for triplicates

**Fig. S1** Mean protein and inulin yields from the press juice. Error bars represent the standard deviation for triplicate experiments. Error bars represent standard deviations for triplicate runs

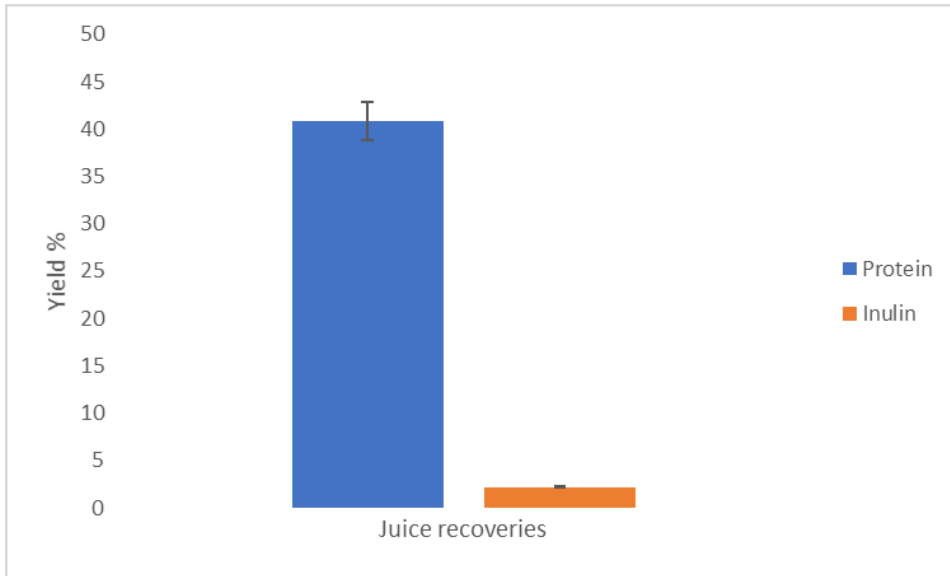

Supplement: 13197_2019_4110_MOESM2_ESM.pdf [file 13197_2019_4110_MOESM2_ESM.pdf]
